# Supplementary material for: Synergetic Effect of Organic Flocculant and Montmorillonite Clay on the Removal of Nano-CuO by Coagulation-Flocculation-Sedimentation Process
Source: MDPI journal article supplement (doi:10.3390/nano11102753), 2021-10-17
Supplement: s1 [file s1]

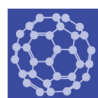

## Article

# Synergetic Effect of Organic Flocculant and Montmorillonite Clay on the Removal of nano-CuO by Coagulation-Flocculation-Sedimentation Process

Rizwan Khan <sup>1</sup>, Muhammad Ali Inam <sup>2</sup>, Kang Hoon Lee <sup>3,\*</sup>, Abdul Sami Channa <sup>1</sup>, Mukhtiar Ali Mallah <sup>1</sup>, Young Min Wie <sup>4</sup> and Mahmood Nabi Abbasi <sup>1</sup>

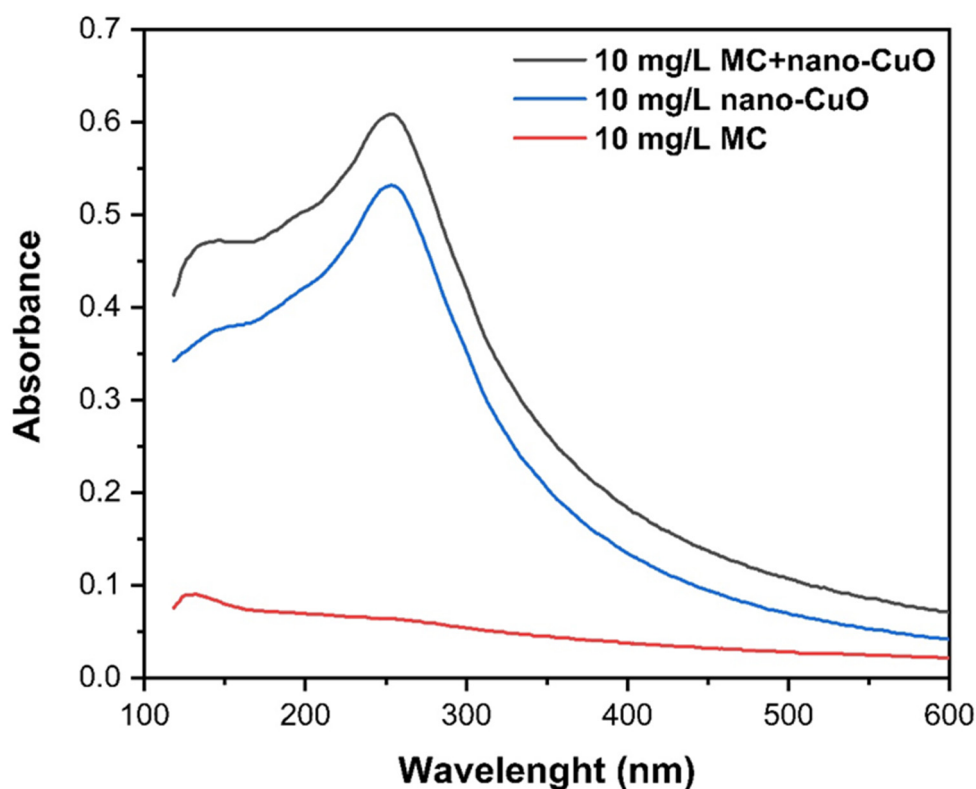

Figure S1. Spectra of pristine nano-CuO, MC and the mixture of nano-CuO + MC.
